# Supplementary material for: Identification and Characterization of Glucosyltransferase That Forms 1-Galloyl-β-d-Glucogallin in Canarium album L., a Functional Fruit Rich in Hydrolysable Tannins
Source: MDPI journal article supplement (doi:10.3390/molecules26154650), 2021-07-31
Supplement: s1 [file s1]

## Supplementary information

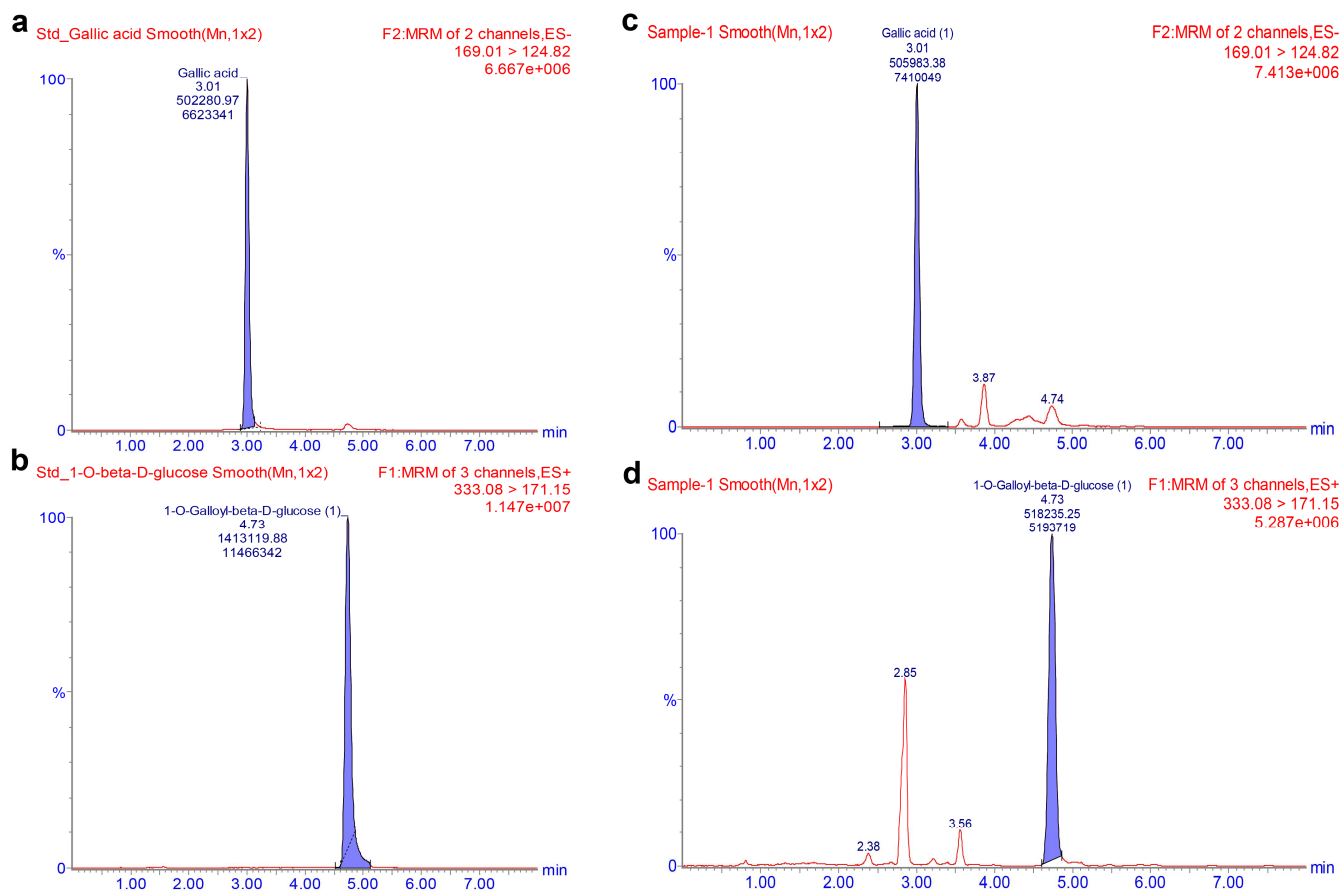

**Figure S1.** Chromatograms of standards and typical samples. **(a), (c)**Chromatograms of GA standard and sample in MRM mode, ESI-,  $m/z$  169.01 $\rightarrow$ 124.82, retention time 3.01. **(b), (d)**Chromatograms of  $\beta$ G standard and sample in MRM mode, ESI+,  $m/z$  333.08 $\rightarrow$ 171.15, retention time 4.73.

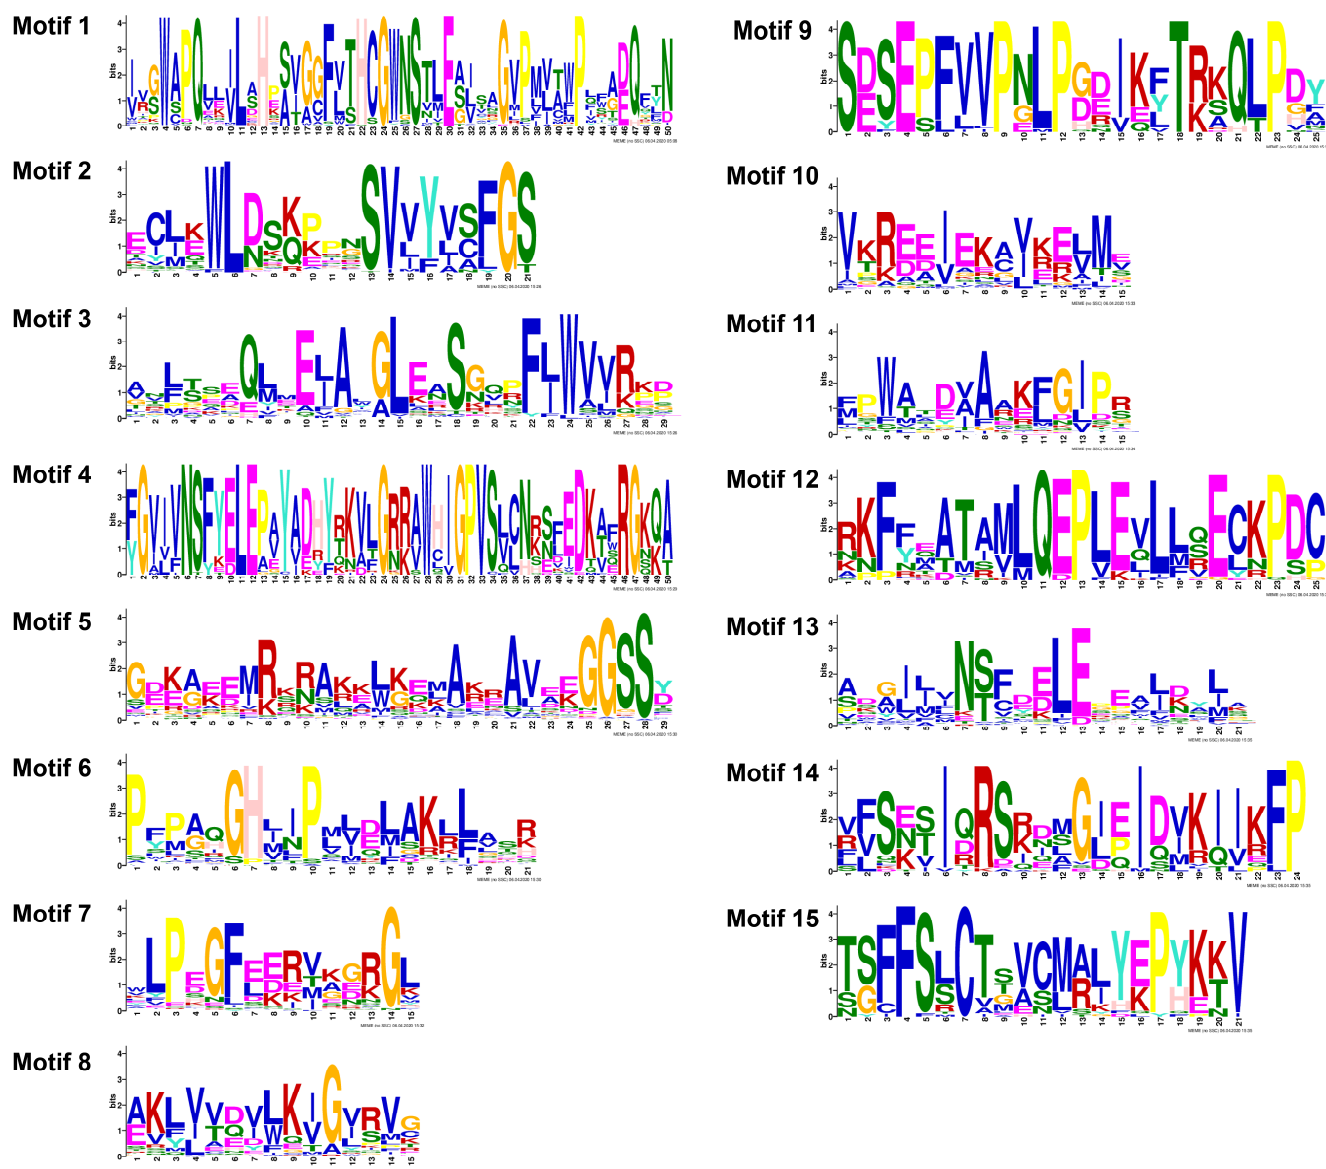

**Figure S2** Conserved motifs from 140 CaUGTs. All 15 motifs were identified by MEME online software (<http://meme-suite.org/>).

|      |                                                                                                              |      |      |      |      |      |      |      |      |      |
|------|--------------------------------------------------------------------------------------------------------------|------|------|------|------|------|------|------|------|------|
|      | 10                                                                                                           | 20   | 30   | 40   | 50   | 60   | 70   | 80   | 90   | 100  |
| 1    | ATGGGCTCTGAGTCTCTTGTCCATGTCTTGCTTTTCATTCCCTGGCCAAAGGCCACGTGAACCCCTCTTCTTAGACTTGCCAAGAACTAGCTTCAAAGGGTTTG     |      |      |      |      |      |      |      |      |      |
| 1    | M G S E S L V H V L L V S F P G Q G H V N P L L R L G K K L A S K G L                                        |      |      |      |      |      |      |      |      |      |
|      | 115                                                                                                          | 125  | 135  | 145  | 155  | 165  | 175  | 185  | 195  | 205  |
| 106  | CTTGTCACCTTACCACCTCTGAAACCACCGGCAACAATTGAGGAAAGCTAGCAACGCCTCCGAAGAGCCGACCCCGATTGGAGATGGGTACATTCCGGTTCGAA     |      |      |      |      |      |      |      |      |      |
| 36   | L V T F T T P E T T G K Q L R K A S N A S E E P T P I G D G Y I R F E                                        |      |      |      |      |      |      |      |      |      |
|      | 220                                                                                                          | 230  | 240  | 250  | 260  | 270  | 280  | 290  | 300  | 310  |
| 211  | TTCTTCGAAGATGGTTGGGATGAGGATGAGCCAAAGGCGCCAAGACCTTGACCAATACTTGCCTCAACTAGAGTTGATTGGCAAGATGTGATTCCACGTATGATC    |      |      |      |      |      |      |      |      |      |
| 71   | F F E D G W D E D E P R R Q D L D Q Y L P Q L E L I G K D V I P R M I                                        |      |      |      |      |      |      |      |      |      |
|      | 325                                                                                                          | 335  | 345  | 355  | 365  | 375  | 385  | 395  | 405  | 415  |
| 316  | CAGAGAAACGCAGAACAAAACCGCCCATTTCTTGCCTAATCAACAATCCTTTCATTCTTGGGTATCCGACGTCGCTACAAGTCTTGGCCTCCCTTTCGCAATG      |      |      |      |      |      |      |      |      |      |
| 106  | Q R N A E Q N R P I S C L I N N P F I P W V S D V A T S L G L P S A M                                        |      |      |      |      |      |      |      |      |      |
|      | 430                                                                                                          | 440  | 450  | 460  | 470  | 480  | 490  | 500  | 510  | 520  |
| 421  | CTTTGGGTCCAATCCTGCGCGTGTCTCTCTTATTATCATTACTATCACGGGTGGTGCCGTTTCCAAGTGAAGAACACCCCTGAAATCGATGTTTCAGTTGCCT      |      |      |      |      |      |      |      |      |      |
| 141  | L W V Q S C A C F S S Y Y H Y Y H G L V P F P S E E H P E I D V Q L P                                        |      |      |      |      |      |      |      |      |      |
|      | 535                                                                                                          | 545  | 555  | 565  | 575  | 585  | 595  | 605  | 615  | 625  |
| 526  | TGATATGCCCTCTGAAGTACGATGAAGTTCCAAGCTTCTTGCATCCGACAACTCCTTACCCTTTCTCTGAGGAGAGCTATTCTCGGTCAGTACAGAAACCTTGAC    |      |      |      |      |      |      |      |      |      |
| 176  | C M P L L K Y D E V P S F L H P T T P Y P F L R R A I L G Q Y R N L D                                        |      |      |      |      |      |      |      |      |      |
|      | 640                                                                                                          | 650  | 660  | 670  | 680  | 690  | 700  | 710  | 720  | 730  |
| 631  | AAGCCTTTTTCATACTGATGGAAGTTTCCAAGAGCTTGAAGCTGAGGTATCGAATACATGTCAAAGGTTTGTCCAATCAAGACAGTTGGCCCACTATTCAAG       |      |      |      |      |      |      |      |      |      |
| 211  | K P F C I L M E S F Q E L E P E V I E Y M S K V C P I K T V G P L F K                                        |      |      |      |      |      |      |      |      |      |
|      | 745                                                                                                          | 755  | 765  | 775  | 785  | 795  | 805  | 815  | 825  | 835  |
| 736  | AACCCTAAAGCGCCAACTCAACTGTCCGCGGTGACCTCATGCAGGCCGATGATTGCATCGAGTGGCTAGACAGTAAACCTCCTTTCTCCGTCGTTTACATCTCT     |      |      |      |      |      |      |      |      |      |
| 246  | N P K A P T S T V R G D L M Q A D D C I E W L D S K P P F S V V Y I S                                        |      |      |      |      |      |      |      |      |      |
|      | 850                                                                                                          | 860  | 870  | 880  | 890  | 900  | 910  | 920  | 930  | 940  |
| 841  | TTCGGCAGCGTCGTTTACCTGAAGCAAGAAATAGACGAAATCGCTTACTGACTGAGTCTGGAGTTTCGTTCTTGTGGGTGATGAAGCCGCGCATATAA           |      |      |      |      |      |      |      |      |      |
| 281  | F G S V V Y L K Q E Q I D E I A Y G L L N S G V S G V S I L W V M K P P H K                                  |      |      |      |      |      |      |      |      |      |
|      | 955                                                                                                          | 965  | 975  | 985  | 995  | 1005 | 1015 | 1025 | 1035 | 1045 |
| 946  | GATTCTGGCTACGAACCTTAATGTTCTCCAGATGGGTTCCTGGAGAAAGTTGGAGACAAAGCGCAAGGTCGTAATAATGGAGTCCACAGGAGAAGGTCCTTAGCACAC |      |      |      |      |      |      |      |      |      |
| 316  | D S G Y E L N V L P D G F L E K V G D N G K V V K W S P Q E K V L A H                                        |      |      |      |      |      |      |      |      |      |
|      | 1060                                                                                                         | 1070 | 1080 | 1090 | 1100 | 1110 | 1120 | 1130 | 1140 | 1150 |
| 1051 | CCAAGTGTGCTGCTTTCGTAAGTCACTGCGGATGGAAGTCAACGATGGAGTCACTGTCGTCAGGGATGCGCGTTGTGGCTTCCCGCAATGGGCGATCAAGTC       |      |      |      |      |      |      |      |      |      |
| 351  | P S V A C F V T H C G G W N S T M E S L S S G M P V V A F P Q W G D Q V                                      |      |      |      |      |      |      |      |      |      |
|      | 1165                                                                                                         | 1175 | 1185 | 1195 | 1205 | 1215 | 1225 | 1235 | 1245 | 1255 |
| 1156 | ACTGACGCTGTGTACTTGGTGGACGTGTTCAAGACTGGAATAAGAATGTGCCGTGGAGAGGCAGAGAACAGGGTGATTCCCGTGATGAGATTGAGAAATGCTTG     |      |      |      |      |      |      |      |      |      |
| 386  | T D A V Y L V D V F K T G I R M C R G E A E N R V I P R D E I E K C L                                        |      |      |      |      |      |      |      |      |      |
|      | 1270                                                                                                         | 1280 | 1290 | 1300 | 1310 | 1320 | 1330 | 1340 | 1350 | 1360 |
| 1261 | CTTGAGGCCACTTCCGGGCGCAAGGCTGCAGAGATGAAGCAAAATGCATTGAAGTGGAAAGAGCGGCGGAGGAAGCGGTGGCCGAAGGTGGCTCCTCCGATAGT     |      |      |      |      |      |      |      |      |      |
| 421  | L E A T S G P K A A E M K Q N A L K W K K A A E E A V A E G G S S D S                                        |      |      |      |      |      |      |      |      |      |
|      | 1375                                                                                                         | 1385 | 1395 | 1405 | 1415 | 1425 | 1435 | 1445 | 1455 | 1465 |
| 1366 | AACATCCAAGCGTTTGTGACGAGGTGAGAAGGAGAAGTGTGAAATTCATTGCAAGTCAAAGGCCATCAAGCCAACAACAGCCAATGGAGTTGCTGATTGGTC       |      |      |      |      |      |      |      |      |      |
| 456  | N I Q A F V D E V R R R S V E I H C K S K A I K P T T A N G V A D L V                                        |      |      |      |      |      |      |      |      |      |
|      | 1480                                                                                                         | 1490 | 1500 | 1510 |      |      |      |      |      |      |
| 1471 | GAGAAGGCAGCCAATGGGAAAGTAGAATTGGTGGAGTCCCTGA                                                                  |      |      |      |      |      |      |      |      |      |
| 491  | E K A A N G K V E L V E S *                                                                                  |      |      |      |      |      |      |      |      |      |

**Figure S3** Coding sequence and encoded amino acid sequence of *UGT84A77*. ATG, start codon; \*, stop codon; the underlined part indicates the conserved UDPGT domain; the shaded part indicates the PSPG box; ▲ indicates the UDPG recognition site.

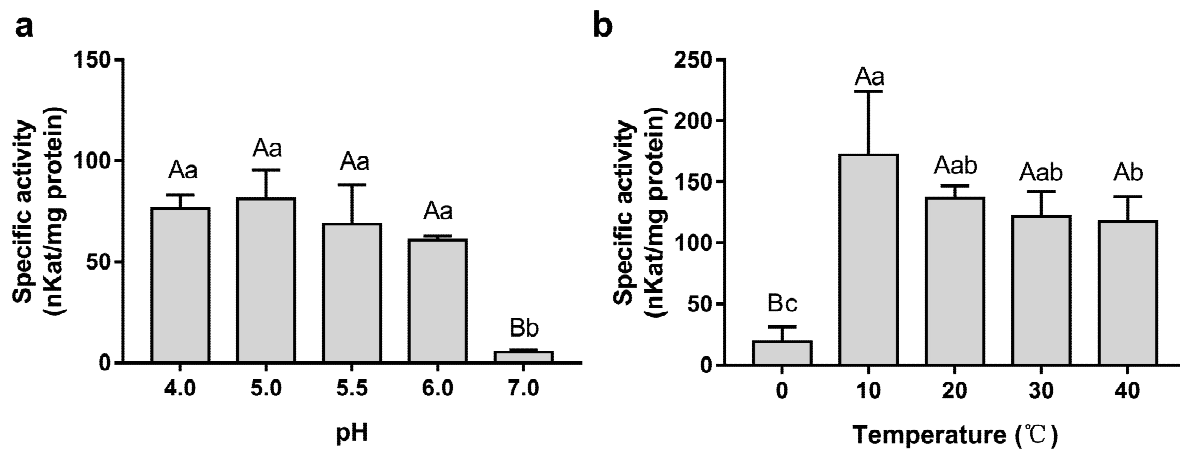

**Figure S4** Effects of pH (**a**) and temperature (**b**) on enzyme activity of UGT84A77 recombinant protein.



**Table S1** Information of UGTs for phylogenetic analysis

| Species                     | Gene           | GenBank accession | Reference                                                                       |
|-----------------------------|----------------|-------------------|---------------------------------------------------------------------------------|
| <i>Canarium album</i> L.    | 140 UGTs       |                   | This study                                                                      |
| <i>Arabidopsis thaliana</i> | 122 UGTs       | See reference     | <a href="http://www.p450.kvl.dk/UGT.shtml">http://www.p450.kvl.dk/UGT.shtml</a> |
| <i>Prunus persica</i>       | Prupe.7G055200 | ONH95178.1        | (Cheng et al. 2019)                                                             |
|                             | Prupe.6G265900 | ONI03570.1        |                                                                                 |
|                             | Prupe.6G267000 | ONI03581.1        |                                                                                 |
|                             | Prupe.6G266600 | ONI03577.1        |                                                                                 |
| <i>Zea mays</i>             | GRMZM2G075387  | ONM25949.1        |                                                                                 |
|                             | GRMZM2G168474  |                   |                                                                                 |
|                             | GRMZM5G834303  |                   |                                                                                 |
| <i>Punica granatum</i>      | PgUGT95B2      | MH507175.1        | (Ono et al. 2016a)                                                              |
|                             | PgUGT84A23     | KT159805.1        |                                                                                 |
|                             | PgUGT84A24     | KT159807.1        |                                                                                 |
| <i>Quercus robur</i>        | QrUGT84A13     | KF527849.1        | (Mittasch et al. 2014)                                                          |
| <i>Fragaria × ananassa</i>  | FaGT2          | AY663785.1        | (Schulenburg et al. 2016)                                                       |
| <i>Vitis vinifera</i>       | VvGT1          | JN164679.1        | (Khater et al. 2012)                                                            |
|                             | VvGT2          | JN164680.1        |                                                                                 |
|                             | VvGT3          | JN164681.1        |                                                                                 |
| <i>Camellia sinensis</i>    | CsUDT84A22     | ALO19890.1        | (Cui et al. 2016b)                                                              |

**Table S2** Primer sequences of the 12 *CaUGTs* for RT-qPCR

| Gene ID        | Sense primer sequence (5'-3') | Anti-sense primer sequence (5'-3') |
|----------------|-------------------------------|------------------------------------|
| Isoform0117852 | TTGTCACCTTCACCACTCC           | CATCCTCATCCCAACCAT                 |
| Isoform0027939 | TATGGAGGAGAAAAAGCG            | TGACTATGTATTGATCGTGGAG             |
| Isoform0016456 | ATGATGACACGGGCAACTA           | TAACCACTCCAGGCAACC                 |
| Isoform0026341 | GGTAGGATGATAGAGGCTGTG         | TCCTCATTTTCTTCCCTTGT               |
| Isoform0033289 | GGTAGGATGATAGAGGCTGTG         | TCCTCATTTTCTTCCCTTGT               |
| Isoform0025823 | GAAGTTGAGGCTGAAAAGAT          | TGAAGCAGACCAAAAAGGA                |
| Isoform0012535 | ACAATCAAAGCCAAAGCAG           | TGGAAATACAACCTCGGAAAC              |
| Isoform0118359 | ACGAAGTTGAGGCTGAAAA           | TTGAAGCAGACCAAAAAGGA               |
| Isoform0011864 | GGCTCGGTGTTATTCGTCT           | CTTATCATTTGGGCTTCTCA               |
| Isoform0117204 | CAAAAGGCTAAGAAGGAAGA          | CACTCACAAACTTGGCACTA               |
| Isoform0029193 | CTGCTGCTATGGAGTATGCT          | GACCAAGAGACCGTCGTTT                |
| Isoform0121163 | CTACCCTTGTTGTTTCTCCT          | CAGTTGTCTTTTGCTATCCG               |
| <i>CaACT7</i>  | AACCCCAAGGCTAACAGG            | TGGCATAAGAGACAGGACA                |

**Table S3** Comparison of enzyme kinetic parameters of the UGT84A subfamily in different species

| Species               | Enzyme   | Substrate    | K <sub>m</sub> (μM) | K <sub>cat</sub> (s <sup>-1</sup> ) | K <sub>cat</sub> /K <sub>m</sub><br>(s <sup>-1</sup> ·M <sup>-1</sup> ) | Reference          |
|-----------------------|----------|--------------|---------------------|-------------------------------------|-------------------------------------------------------------------------|--------------------|
| <i>Canarium album</i> | UGT84A77 | GA           | 108.90 ± 21.06      | 3.71 ± 0.18                         | 34076.64                                                                | This research      |
|                       |          | UDPG         | 193.30 ± 34.33      | 0.74 ± 0.04                         | 3844.87                                                                 |                    |
| <i>Vitis vinifera</i> | VvgGT1   | Gallic acid  | 510 ± 32            | 2.16 ± 0.28                         | 4231                                                                    | Khater et al. 2012 |
|                       |          | Caffeic acid | 165 ± 67            | 1.16 ± 0.12                         | 7069                                                                    |                    |
|                       | VvgGT2   | Gallic acid  | 884 ± 188           | 2.82 ± 0.24                         | 3194                                                                    |                    |

|                          |            |                            |             |             |                       |                    |
|--------------------------|------------|----------------------------|-------------|-------------|-----------------------|--------------------|
|                          |            | Caffeic acid               | 105 ± 30    | 1.48 ± 0.09 | 14142                 |                    |
|                          | VvgGT3     | Gallic acid                | 566 ± 190   | 2.19 ± 0.09 | 3873                  |                    |
|                          |            | Caffeic acid               | 142 ± 57    | 1.07 ± 0.10 | 7567                  |                    |
| <i>Eutrema</i>           | UGT84A57   | Apigenin                   | 1.28 ± 0.41 | 0.55 ± 0.09 | 4.4 × 10 <sup>5</sup> | (Mashima et al.    |
| <i>japonicum</i>         | (WjGT1)    | UDP-glucose                | 168 ± 38    | 0.15 ± 0.02 | 8.9 × 10 <sup>2</sup> | 2019)              |
| <i>Eucalyptus</i>        | UGT84A25a  | Gallic acid                | 168 ± 14    | 13.5 ± 0.3  |                       | (Tahara et al.     |
| <i>camaldulensis</i>     |            | Protocatechuic acid        | 170 ± 9     | 12.7 ± 0.2  |                       | 2018a)             |
|                          |            | Vanillic acid              | 103 ± 8     | 12.6 ± 0.2  |                       |                    |
|                          | UGT84A26a  | Gallic acid                | 190 ± 16    | 10.7 ± 0.2  |                       |                    |
|                          |            | Protocatechuic acid        | 149 ± 7     | 10.1 ± 0.1  |                       |                    |
|                          |            | Vanillic acid              | 111 ± 9     | 10.4 ± 0.2  |                       |                    |
| <i>Quercus robur</i>     | UGT84A13   | Gallic acid                | 420         |             |                       | (Mittasch et al.   |
|                          |            | Protocatechuic acid        | 290         |             |                       | 2014)              |
|                          |            | Vanillic acid              | 230         |             |                       |                    |
| <i>Camellia sinensis</i> | CsUGT84A22 | Gallic acid                | 758.4       |             |                       | (Cui et al. 2016a) |
|                          |            | p-Coumaric acid            | 531.4       |             |                       |                    |
| <i>Punica granatum</i>   | UGT84A23   | Gallic acid                | 890±70      | 0.52±0.03   | 580                   | (Ono et al.        |
|                          |            | 4-hydroxy benzoic acid     | 1190±30     | 0.61±0.03   | 510                   | 2016b)             |
|                          |            | 3,4-dihydroxy benzoic acid | 2460±260    | 0.76±0.06   | 310                   |                    |
|                          |            | Catfeic acid               | 1060±110    | 0.64±0.05   | 600                   |                    |
|                          |            | Cinnamic acid              | 1120±80     | 0.56±0.02   | 500                   |                    |
|                          |            | Coumanic acid              | 940±130     | 0.52±0.07   | 550                   |                    |
|                          |            | Ferulic acid               | 1580±10     | 0.72±0.01   | 460                   |                    |
|                          |            | Sinapic acid               | 860±50      | 0.5±0.02    | 580                   |                    |
|                          | UGT84A24   | Gallic acid                | 980±10      | 0.55±0.01   | 560                   |                    |
|                          |            | 4-hydroxy benzoic acid     | 1170±30     | 0.6±0.01    | 510                   |                    |
|                          |            | 3,4-dihydroxy benzoic acid | 4440±730    | 1.35±0.19   | 300                   |                    |
|                          |            | Catfeic acid               | 1770±170    | 0.89±0.08   | 500                   |                    |
|                          |            | Cinnamic acid              | 860±90      | 0.45±0.04   | 520                   |                    |
|                          |            | Coumanic acid              | 1060±150    | 0.44±0.08   | 420                   |                    |
|                          |            | Ferulic acid               | 1320±20     | 0.66±0.01   | 500                   |                    |
|                          |            | Sinapic acid               | 780±20      | 0.44±0.01   | 560                   |                    |

**Table S4** PCR primer sequences for *UGT84A77*

| Primers                   | Primer sequence (5'-3')             |
|---------------------------|-------------------------------------|
| <i>UGT84A77</i> -F        | caccATGGGCTCTGAGTCTCTTGTC           |
| <i>UGT84A77</i> -R        | GGACTCCACCAATTCTACTTTCC             |
| <i>UGT84A77</i> -F-BamH I | gagagaGGATCCATGGGCTCTGAGTCTCTTGTC   |
| <i>UGT84A77</i> -R-Sal I  | gagagaGTCGACGGACTCCACCAATTCTACTTTCC |

Note: Lowercase letters denote protective bases, and underlining denotes digestion sites.
